# Supplementary material
Source: PubMed Central journal article supplement (PMC7031047)

# Source Data for Fig. 2

**c**

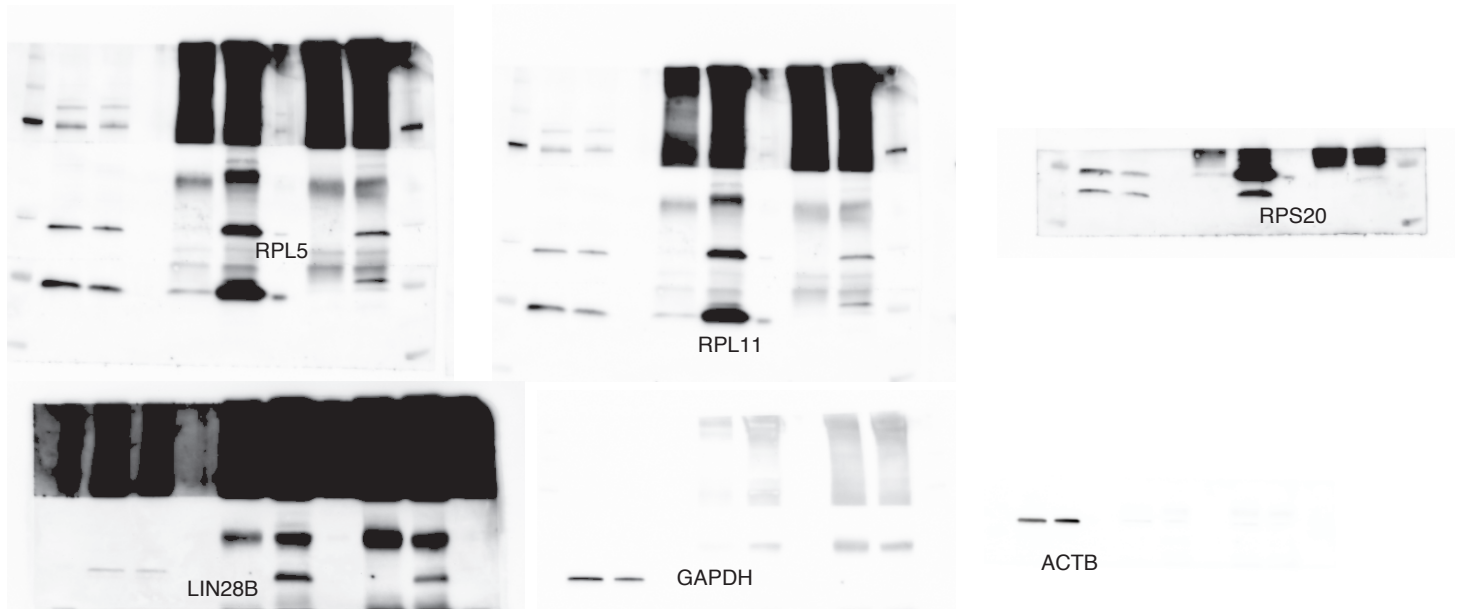

**e**

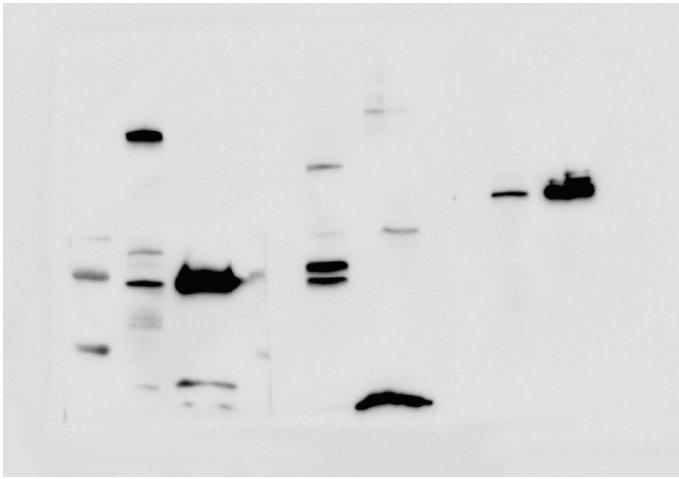

**g**

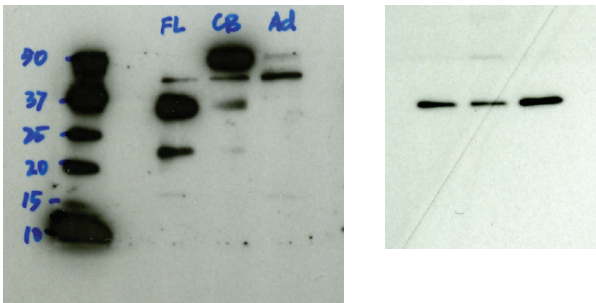

Supplement: NIHMS1546343-supplement-source_data2.pdf [file NIHMS1546343-supplement-source_data2.pdf]

Source Data for Fig. 3

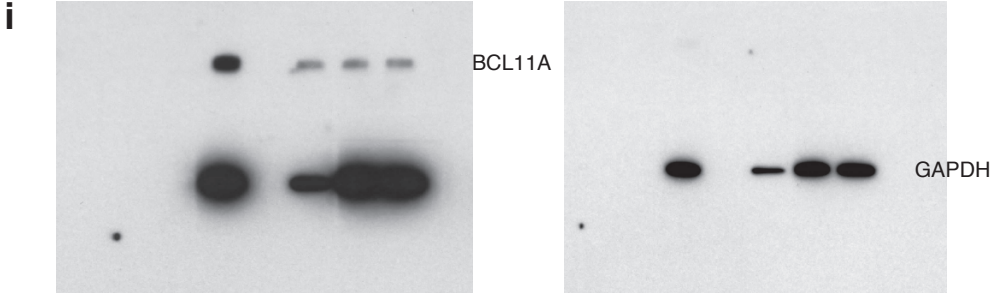

Supplement: NIHMS1546343-supplement-source_data3.pdf [file NIHMS1546343-supplement-source_data3.pdf]

Source Data for Fig. 4

**i**

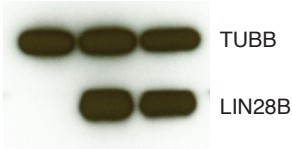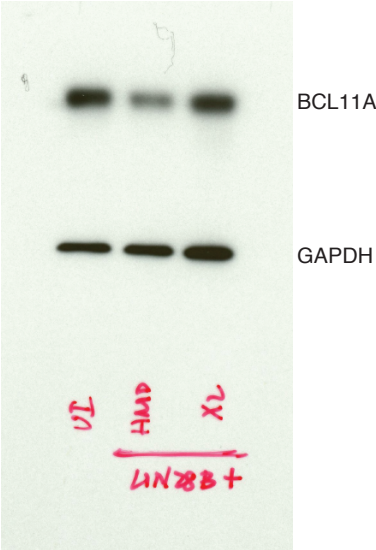

Supplement: NIHMS1546343-supplement-source_data4.pdf [file NIHMS1546343-supplement-source_data4.pdf]

Source Data for Extended Data Fig. 1

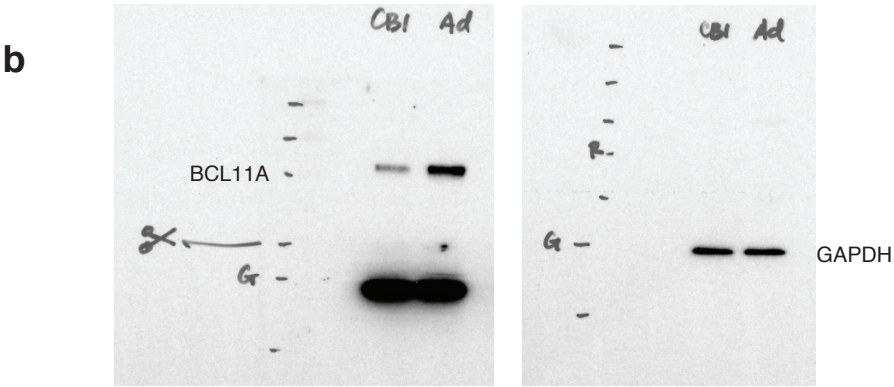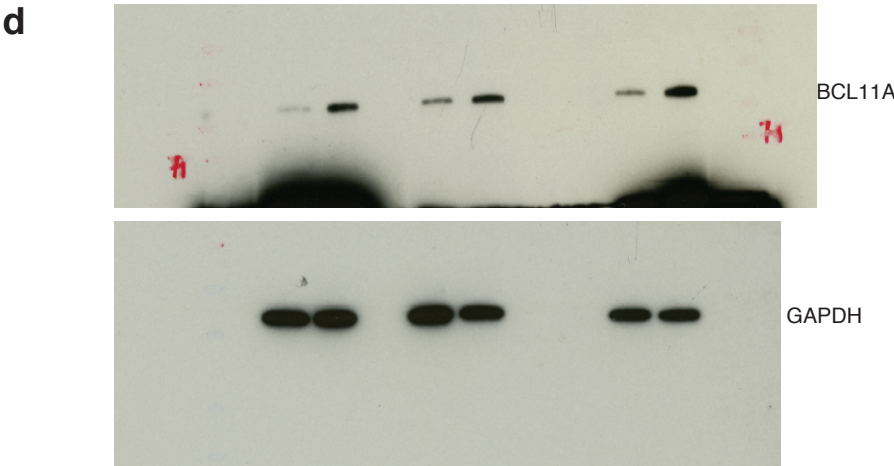

**i**

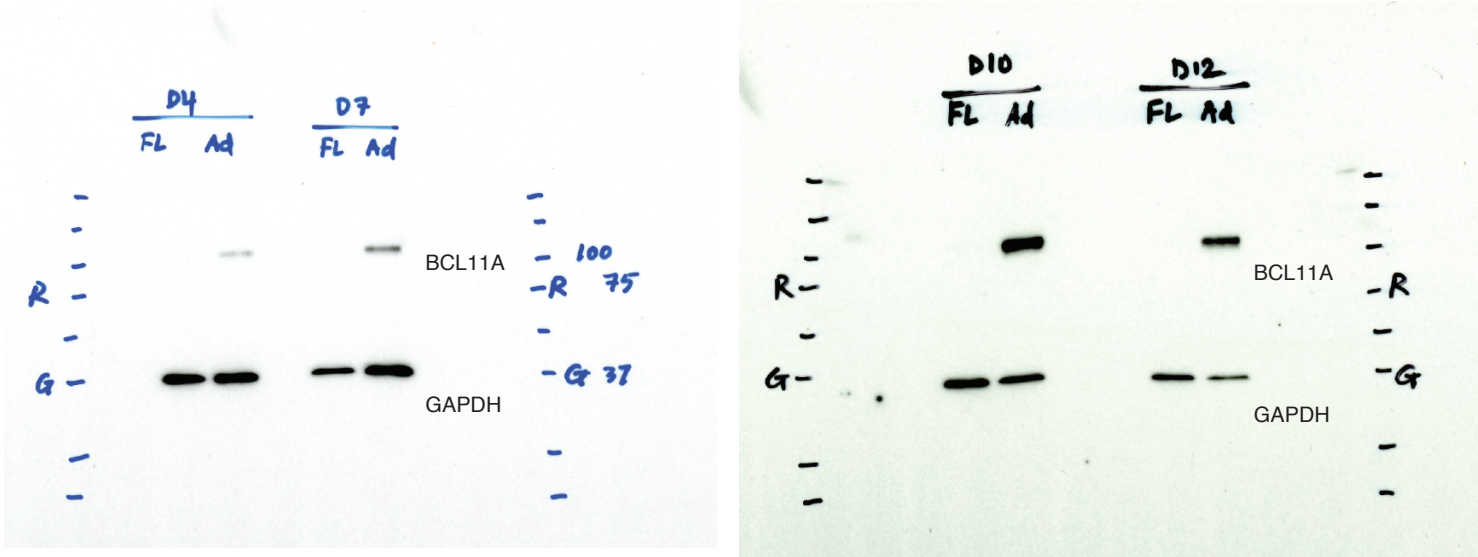

Supplement: NIHMS1546343-supplement-source_data_extended1.pdf [file NIHMS1546343-supplement-source_data_extended1.pdf]

Source Data for Extended Data Fig. 10

**b**

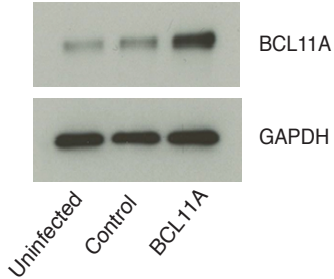

Supplement: NIHMS1546343-supplement-source_data_extended10.pdf [file NIHMS1546343-supplement-source_data_extended10.pdf]

Source Data for Extended Data Fig. 3

**a**

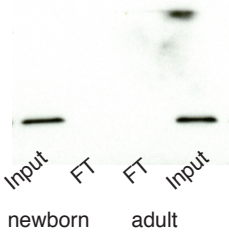

**b**

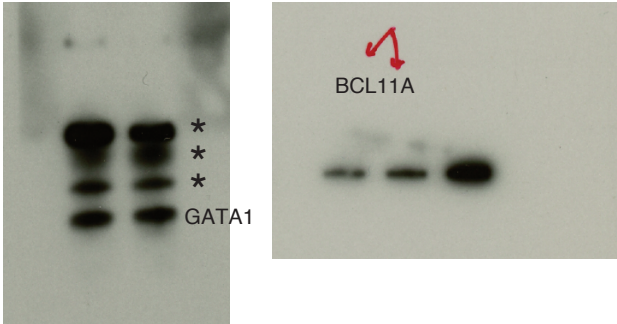

Supplement: NIHMS1546343-supplement-source_data_extended3.pdf [file NIHMS1546343-supplement-source_data_extended3.pdf]

Source Data for Extended Data Fig. 4

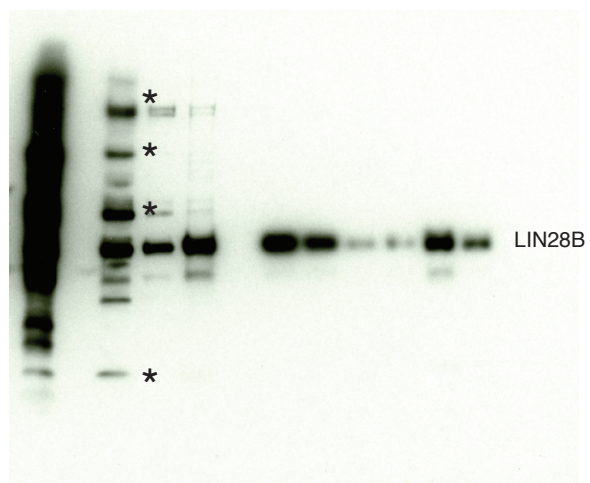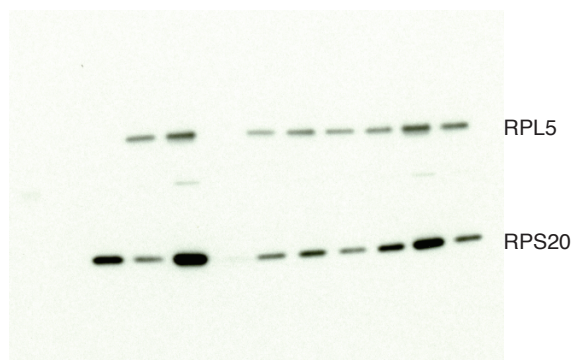

Supplement: NIHMS1546343-supplement-source_data_extended4.pdf [file NIHMS1546343-supplement-source_data_extended4.pdf]

Source Data for Extended Data Fig. 5

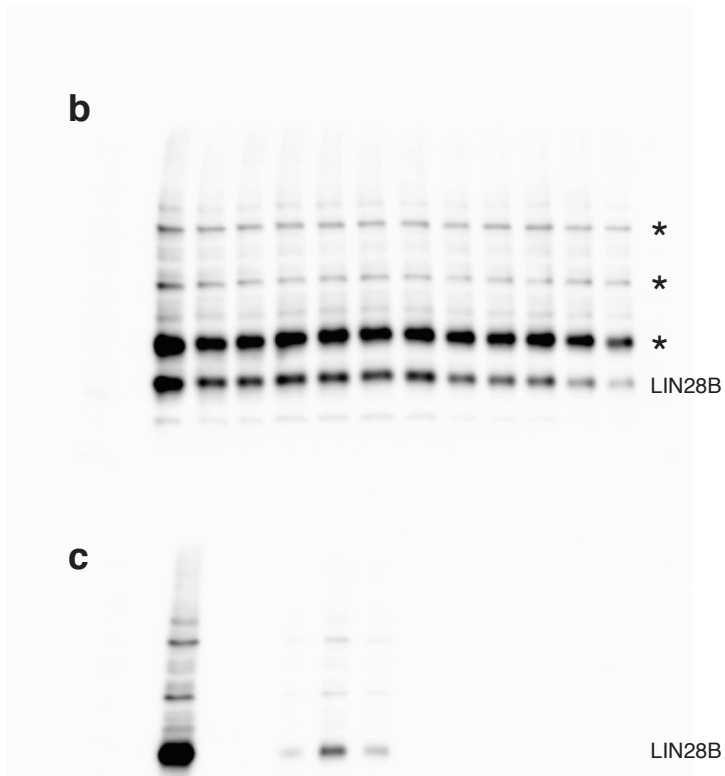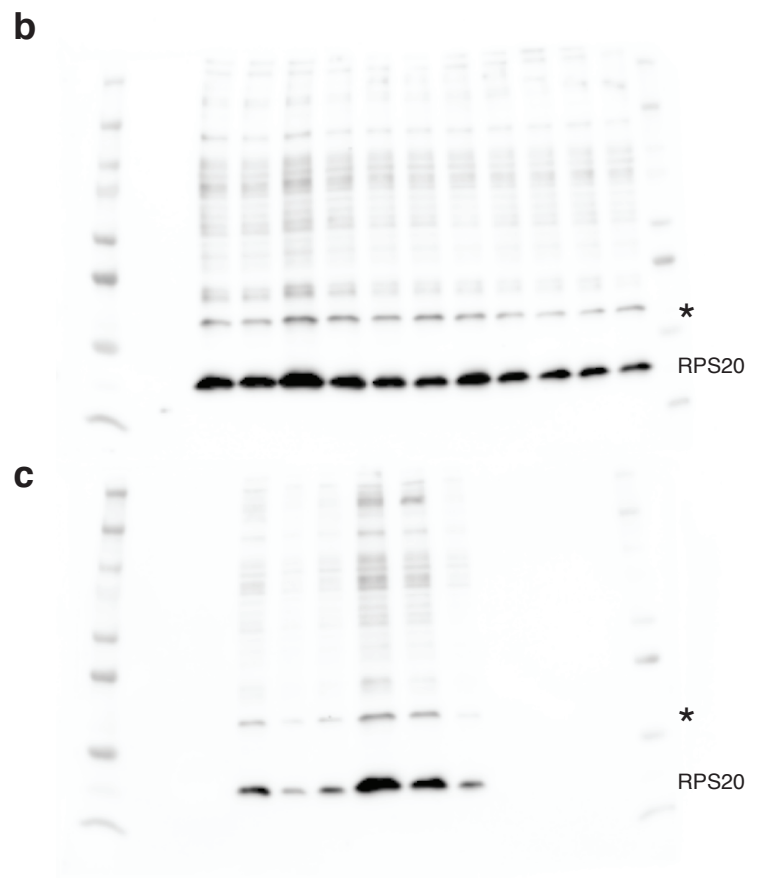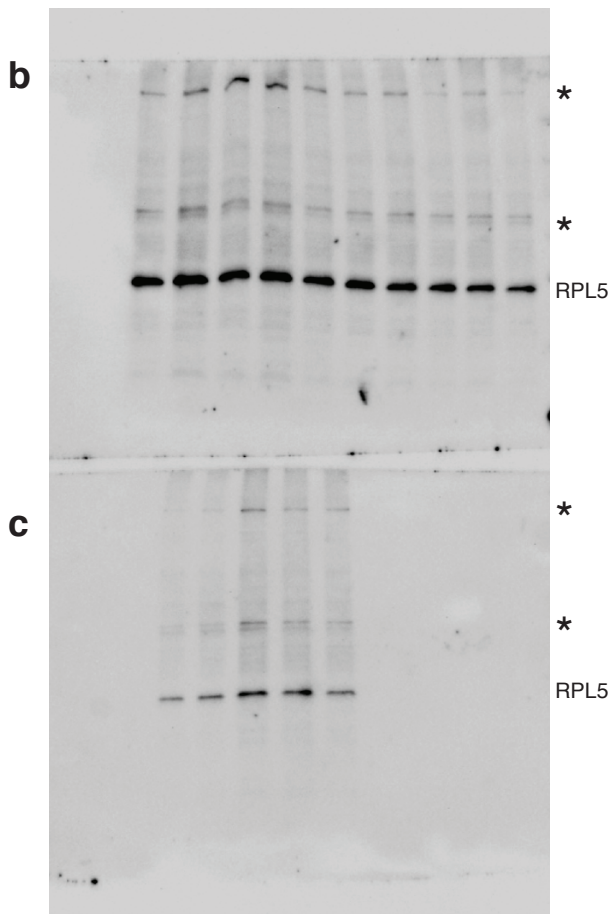

Supplement: NIHMS1546343-supplement-source_data_extended5.pdf [file NIHMS1546343-supplement-source_data_extended5.pdf]
